# Supplementary material
Source: publisher site journal article supplement (https://www.dovepress.com/get_supplementary_file.php?f=484694.docx)
Supplement: Supplementary file 1 [file get_supplementary_file.php]

**Figure S1**

**
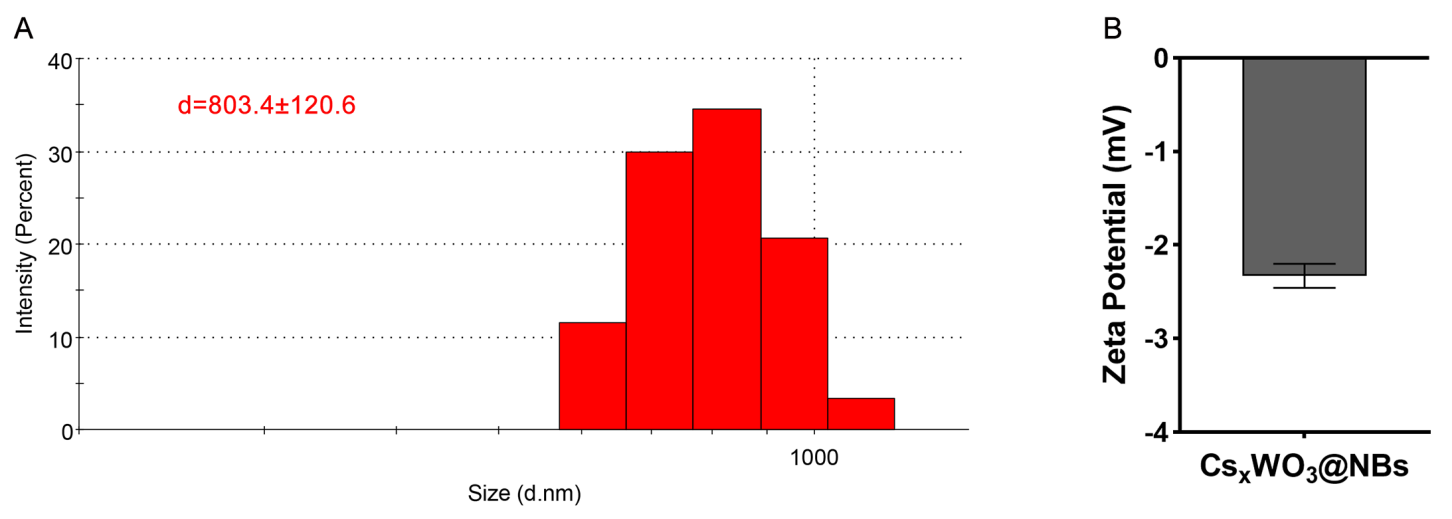
**

**Figure S2**


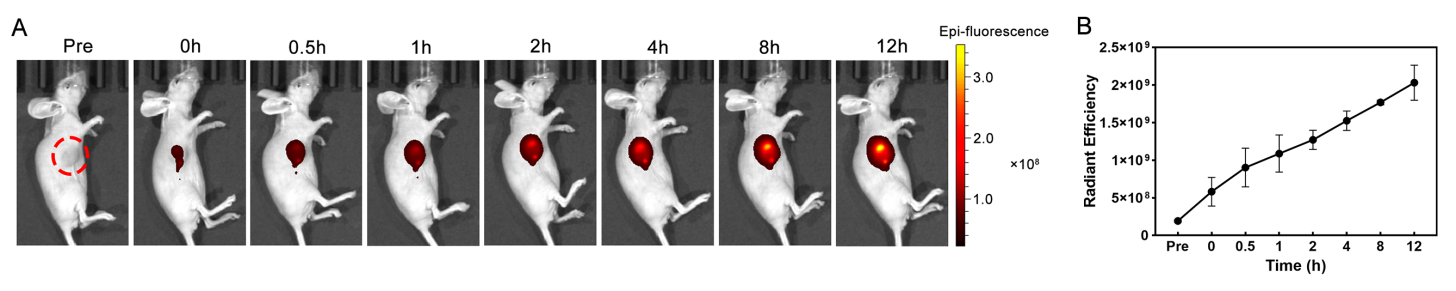


**Figure S1.** Characterization of the CsxWO3@NBs. (A) Hydrodynamic diameter of CsxWO3@NBs in PBS stored at 37 ℃ for 24 h. (B) Zeta potential of CsxWO3@NBs in PBS stored at 37 ℃ for 24 h.

**Figure S2.** Fluorescence imaging in vivo. (A) Fluorescence images of tumors before and after the intratumoral injection of DIR–CsxWO3@NBs for different times. (B) Fluorescence intensity of tumors before and after the intratumoral injection of DIR–CsxWO3@NBs for different times.
